# Supplementary material for: Behavioral Determinants of Objectively Assessed Diet Quality in Obese Pregnancy
Source: MDPI journal article supplement (doi:10.3390/nu11071446), 2019-06-26
Supplement: s1 [file s1]

## Supplementary Data

### **Behavioral determinants of objectively assessed diet quality in obese pregnancy**

Jasper Most<sup>1</sup>, Candida J Rebello<sup>2</sup>, Abby D Altazan<sup>1</sup>, Corby K Martin<sup>3</sup>, Marshall St Amant<sup>4, 5</sup>,  
Leanne M Redman<sup>1</sup>

<sup>1</sup> Reproductive Endocrinology and Women's Health Laboratory, Pennington Biomedical Research Center, 6400 Perkins Road, Baton Rouge, LA 70808

<sup>2</sup> Clinical Trials Unit, Pennington Biomedical Research Center, 6400 Perkins Road, Baton Rouge, LA 70808

<sup>3</sup> Ingestive Behavior, Weight Management, and Health Promotion Laboratory, Pennington Biomedical Research Center, 6400 Perkins Road, Baton Rouge, LA 70808

<sup>4</sup> LSU Health Sciences Center, 433 Bolivar St, New Orleans, LA 70112

<sup>5</sup> Woman's Hospital, 100 Woman's Way, Baton Rouge, LA 70817

## **Supplemental Data**

### **Supplemental Table 1. HEI components**

**Supplemental Table 1. HEI components**

| Category                      | All,<br>n=56 | Average<br>Score     | Distribution<br>Good, Needs<br>Improvement,<br>Poor, in % | Range | Standard for Maximum<br>Score |
|-------------------------------|--------------|----------------------|-----------------------------------------------------------|-------|-------------------------------|
| Healthy Eating Index          | 46.7±1.3     | Poor                 | 0, 29, 71                                                 | 0-100 |                               |
| Total Fruit                   | 2.0±0.2      | Poor                 | 16, 11, 73                                                | 0-5   | ≥ 0.8 cup eq/1000 kcal        |
| Whole Fruit                   | 1.8±0.2      | Poor                 | 14, 13, 73                                                | 0-5   | ≥ 0.4 cup eq/1000 kcal        |
| Vegetables                    | 2.9±0.2      | Needs<br>Improvement | 14, 50, 36                                                | 0-5   | ≥ 1.1 cup eq/1000 kcal        |
| Greens and Beans              | 1.7±0.2      | Poor                 | 9, 25, 66                                                 | 0-5   | ≥ 0.2 cup eq/1000 kcal        |
| Whole Grains                  | 1.6±0.3      | Poor                 | 2, 7, 91                                                  | 0-10  | ≥ 1.5 oz/1000 kcal            |
| Dairy                         | 5.5±0.3      | Needs<br>Improvement | 14, 45, 41                                                | 0-10  | ≥ 1.3 oz/1000 kcal            |
| Total Protein Foods           | 4.3±0.1      | Good                 | 68, 30, 2                                                 | 0-5   | ≥ 2.5 oz/1000 kcal            |
| Seafood and Plant<br>Proteins | 2.0±0.2      | Poor                 | 13, 23, 64                                                | 0-5   | ≥ 0.8 oz/1000 kcal            |
| Fatty Acids                   | 4.6±0.4      | Poor                 | 13, 27, 61                                                | 0-10  | (PUFAs+MUFAs)/SFAs<br>≥ 2.5   |
| Refined Grains                | 5.5±0.4      | Needs<br>Improvement | 20, 38, 43                                                | 0-10  | ≤ 1.8 oz/1000 kcal            |
| Sodium                        | 3.4±0.3      | Poor                 | 5, 16, 79                                                 | 0-10  | ≤ 1.1 g/1000 kcal             |
| Added Sugars                  | 6.8±0.4      | Needs<br>Improvement | 43, 27, 30                                                | 0-10  | ≤ 6.5% of energy              |
| Saturated Fats                | 4.5±0.3      | Poor                 | 5, 34, 61                                                 | 0-10  | ≤ 8% of energy                |

Data are given as mean±sem. The lowest and highest observed values as well as the potential ranges are provided for each food group category.
